# Supplementary material
Source: publisher site journal article supplement (https://www.spandidos-publications.com/3725/downloadSupplementary)

Figure S1. Reverse transcription-quantitative PCR analysis of Akt1 expression in C4-2 cells transfected with Akt1shRNA, AktNC or Control. Data are expressed as the mean  $\pm$  SD (n=3); each bar represents the mean of three independent experiments carried out in triplicate. \*\*P<0.01. shRNA, short hairpin RNA; NC, negative control.

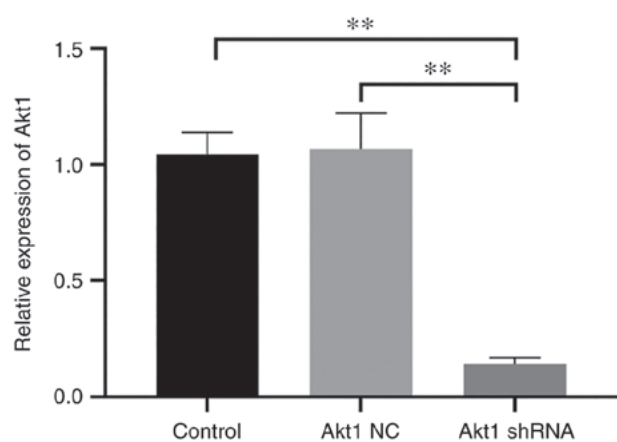

Supplement: Supplementary file 1 [file downloadSupplementary]
